# Supplementary material
Source: PubMed Central journal article supplement (PMC10291877)
Supplement: NIHMS1903730-supplement-Supplementary_Material.pdf [file NIHMS1903730-supplement-Supplementary_Material.pdf]

**Developmental Cell, Volume 51**

**Supplemental Information**

**Self-Organization of Mouse Stem Cells**

**into an Extended Potential Blastoid**

**Berna Sozen, Andy L. Cox, Joachim De Jonghe, Min Bao, Florian Hollfelder, David M. Glover, and Magdalena Zernicka-Goetz**

## Supplemental Figure Legends

**Figure S1. Generation of blastoids. Related to Figure 1.** **A.** Images of a single microwell from an AggreWell containing an EPSC-aggregate and single TSCs at 0h, and the emergence of a blastocyst-like structure over 96h. Bar=200 $\mu$ m. Image on the right shows a representative blastocyst-like structure built from EPSCs that express nuclear PDGFR $\alpha$ -H2B-GFP and TSCs that express ubiquitous eGFP. Bar=20 $\mu$ m. **B.** Low magnification transmitted-light image of EPS-blastoids generated in a typical experiment after 96h. **C.** Frequency of cystic structure formation under normoxia (20% O<sub>2</sub>) versus hypoxia (5% O<sub>2</sub>) from ESC (ES-blastoid, SB-Lif) or EPSC (EPS-blastoid, SB-EP) cells. After 96h of co-culture, all aggregates from an AggreWell, containing 1200 microwells were collected and scored over 3 separate experiments per group. Cystic structures that had a single layer of TSC-derived epithelium containing an acentric EPSC or ESC-derived inner compartment were considered as synthetic blastocyst (SB). Two-sided Student's t test,  $P < 0.001$ . Error bars, SEM. **D.** EPS-blastoid built from EPSCs that express nuclear PDGFR $\alpha$ -H2B-GFP and TSCs that express ubiquitous eGFP at 96h showing all three blastocyst lineages. Nanog, grey. Note PE-like cells align with blastocoel cavity. **E.** Montage panel for 59 Z-sections of a representative EPS-blastoid generated with EPSCs (expressing membrane CAG:GFP) and TSCs (expressing ubiquitous eGFP). Please note that the outside TE-like epithelium expresses ubiquitous-GFP throughout. Membrane CAG:GFP signal is confined to inner compartment and co-expresses Nanog (magenta). **F.** A representative EPS-blastoid at 100h generated with dual reporter EPSCs (membrane mTmG-tomato, nuclear PDGFR $\alpha$ -H2B-GFP) and TS:GFP (ubiquitous eGFP). Structure stained with Sox17 to confirm PE identity. Please note that no contribution from EPSCs is observed in the TE-like layer. **G.** EPSC-only aggregation experiment (formed under the same sequential culture conditions and duration as for EPS-blastoid experiments). No cavitation or CDX2 positive cell specification is observed. **H.** Left: Quantitation of PE positive cells per structure. Early blastocyst (EB, E3.5,  $n=11$ ), late blastocyst (LB, E4.75,  $n=7$ ) and EPS-blastoid (SB, 96h,  $n=20$ ). Error bars, SEM. Right: Quantification of cell numbers in EPSC/Epi, TSC/TE, PE/PE-like layers in early blastocyst (EB, E3.5,  $n=13$ ), late blastocyst (LB, E4.75,  $n=7$ ) and EPS-blastoid (SB, 96h,  $n=27$ ). Error bars, SEM.

**Figure S2. Transcriptome analyses of lineages specified in synthetic blastocysts. Related to Figure 2.** **A.** Upper illustration depicts cell collection for single-cell RNA-sequencing (sc-RNAseq) from ESC- (generated in media containing Serum/Lif, SB-Lif) or EPSC-derived (generated under EP conditions, SB-EP) blastocysts. UMAP dimensional reduction illustrates three clearly defined clusters in stem cell-derived blastocysts representing the three blastocyst lineages. **B. Top:** Dot-plot showing proportion and scaled expression levels of lineage fate determining genes within Epi-like (Epi-L), TE-like (TE-L) or PE-like (PE-L) cell clusters of ES- (SB-Lif) or EPS-blastoids (SB-EP) following sc-RNAseq. **Bottom:** UMAP dimensional reduction plots selected lineage specific-genes within Epi-like, TE-like or PE-like cell clusters of EPS-blastoids following sc-RNAseq. **C.** Pie charts showing percentage of cells with PE-like identity that presumably become specified from ESC- or EPSC-derived ICM-like compartment.  $n= 52/804$  in ESCs;  $123/1210$  EPSCs. Calculated from number of PE-like cells relative to EPI-like cells in the PE-cluster from sc-RNAseq data. **D.** Volcano plots illustrating the DEGs (absolute value of log<sub>2</sub>FC higher than 1 and a Bonferroni corrected p-value lower than 0.005) for each lineage between the downsampled SB-EP and natural embryo E4.5. Downsampling of the synthetic structures was carried out to account for discrepancies in sample sizes between the samples (PE-L = 68 cells, Epi-L = 32 cells, TE-L = 38 cells). **E.** STRING

v10 (Szklarczyk et al., 2015) Biological Process Gene Ontology (GO) analysis of DEGs (absolute value of log<sub>2</sub>FC higher than 0.7 and a Bonferroni corrected p-value lower than 0.01) illustrating pathway enrichment and depletion between SB-EP and E4.5. The 8 enriched pathways in SB-EP were plotted alongside the 42 pathways with the lowest False Discovery Rate (FDR). **F.** Phylogenetic tree analysis between the lineages of the downsampled SB-EP, downsampled SB-Lif and E4.5 blastocyst on the dataset's variable features, illustrating lineage hierarchy conservation throughout the synthetic structures. **G.** UMAP dimensional reduction plot of the cells from the synthetic and natural embryos before random downsampling according to the colour-coded represented lineages, identified according to Klf2, Gata6 and Gata3 lineage marker expression.

**Figure S3. Molecular features of PE and DE derivatives. Related to Figure 2.** **A.** UMAP dimensional reduction shows PE cluster in stem cell-derived blastocysts and E3.5, E4.5, and DE cluster in E7.5 (Nowotschin et al., 2019). **B.** PE (*Gata6*, *Sox7*, *Rhox5*) and DE (*Cer1*, *Nnat*, *Apela*) marker expression on the dimensional reduction map. **C.** Wilcoxon rank sum test results between the synthetic PE from the extended pluripotency protocol and DE cells from the natural embryo at E7.5. p\_val stands for p-value. Log<sub>2</sub>FC stands for log<sub>2</sub>-foldchange (positive values mean upregulation in PE from the extended pluripotency protocol and negative values signify downregulation).

**Figure S4. Molecular features of endoderm derivatives in ES- and EPS-blastoids. Related to Figure 2.** **A.** Violin graphs showing the distribution of expression levels of PE-specific genes within PE-like cell cluster of ES- (SB-Lif) or EPS-blastoids (SB-EP). **B.** UMAP clustering graphs comparing cell populations positive for *Gata6*, *Gata4*, *Pdgfra* or *Nanog*, within the PE-like cell cluster from either ESC- or EPS-derived blastoids. **C.** Dot-plot showing proportion and scaled expression levels of PE fate determining genes within PE-like cell cluster of ES- or EPS-blastoids in each batch following sc-RNAseq.

**Figure S5. Self-organisation of blastoids into post-implantation structures *in vitro*. Related to Figure 5.** **A.** Frequency of EPS-blastoids developed using Matrigel or 2D IVC methods. On average 11.8% of structures self-organised into a cylindrical morphology comprising aligned EPSC/TSC compartments. 160 structures scored over 8 separate experiments. 4 experiment excluded because of a total developmental failure. Lower panel shows a representative post-implantation-like structure formed by the self-organisation of EPS-blastoids after 24h *in vitro*. PDGFRa-H2B-GFP endogeneous signal defines the PE cell-derived VE-like layer. TSC-derived ExE-like compartment stained for Tfp2c (red), EPSC-derived Epi-like compartment stained for Oct4 (yellow). *n*=5 structures, 3 separate experiments. **B.** EPS-blastoids built from CAG:GFP EPSCs and wild-type TSCs transferred into IVC that showed post-implantation-like morphology transition within 20h. *n*=24 structures, 11 separate experiments. **C.** The vast majority of ESC-derived blastoids died shortly after transfer into IVC (91.7%, image on the left). 8.3% of the ES-blastoids formed aggregates with non-polarised ESC-TSC compartments (image on the right); 120 structures scored over 6 separate experiments. 5 experiments excluded because of total developmental failure. Graph on the right shows frequency of EP-blastoids developed using Matrigel or 2D IVC methods. Error bars, SEM. **D.** Individual frames from time-lapse recordings of development of EPS-blastoids built from CAG:GFP EPSCs and wild-type TSCs transferred into IVC showing post-implantation-like morphology transition over 47h. White dashed line outlines the EPSC-derived ICM-like compartment. Please note

that CAG promoter-driven transgenes become silenced in extraembryonic lineages in this particular line (Rhee et al. 2006; Griswold et al. 2011, Abe and Fujimora, 2013, Bedzhov and Zernicka-Goetz, 2014) Time-lapse images captured at 30 min intervals. Representative series from 3 separate time-lapse movies of 3 structures. Bar=20 $\mu$ m. Please note that the structure has attached to the imaging dish (ibidi) and spread on the surface, and that by the final time points the structure is growing upwards, with the EPS-derived EPI (as marked by OCT4 and CAG-GFP) positioned on top (panel on the right). **E.** The formation of PE cell-derived VE-like layer in IVC. The PDGFR $\alpha$ -H2B-GFP endogeneous signal defines the VE-like layer.

**Figure S6. Decidualisation induced by implanting EPS-blastoids *in vivo*. Related to Figure 6.**

**A.** Immunohistochemical staining of decidua at 7.5 d.p.c and EPS-blastoid (synthetic blasocyst; SB)-induced decidua 4 days post-transfer revealing Ptgs2. Distinguishable PDZ and SDZ reveal sustainable decidua patterning.  $n=2$  NB-induced;  $n=2$  EPS-blastoid-induced decidua. **B.** Immunohistochemical staining of the decidua at 5.5 d.p.c and EPS-blastoid-induced decidua 3 or 4 days post-transfer revealing Ki67. Normal tissue proliferation was observed in all cases.  $n= 2$  NB-induced;  $n=2$  SB-induced deciduae. **C.** Immunohistofluorescence staining of the core trophoblast-stem-cell self-renewal markers showing expression restricted to ExE lineage of implanted conceptus. Decidua at 5.5 d.p.c. Cdx2, green; Eomes, white. **D.** EPS-blastoid-induced decidua with GFP (green), SOX2 (red), EOMES (white) positive signals in implanting conceptus.  $n=5$  SB-induced decidua. **E.** EPS-blastoid-induced decidua with GFP (green) positive signals in implanting conceptus. Note LE is broken down as implantation progresses. Asterisks mark GFP-positive signal from the implanting conceptus, yellow arrows indicate broken epithelium.  $n=3$  SB-induced decidua. **F.** *Upper panel:* Decidua at 5.5 d.p.c. showing LE before closure and disappearance at implantation site. Serial section of same decidua stained for Ptgs2 defining implantation site (right). e, embryo.  $n=3$  NB-induced decidua. *Lower panel:* EPS-blastoid-induced decidua dissected 3 days after transfer showing LE before closure and disappearance at implantation site. Serial section of same decidua stained for Ptgs2 defining implantation site (right). Yellow asterisk marks implantation site.  $n=6$  SB-induced decidua.

**Supplementary Table 1. Oligonucleotide sequences used to barcode the final library. Related to STAR methods, droplet microfluidics scRNA-seq and library preparation**

**Supplementary Table 2- Sequencing and data pre-processing parameters. Related to STAR methods, library sequencing, data pre-processing RNA-sequencing and mapping of reads.**

**Supplementary Table 3- Commands for UMAP dimensional reduction plotting and cluster identification. Related to STAR methods, batch-effect correction and UMAP dimensional reduction.**

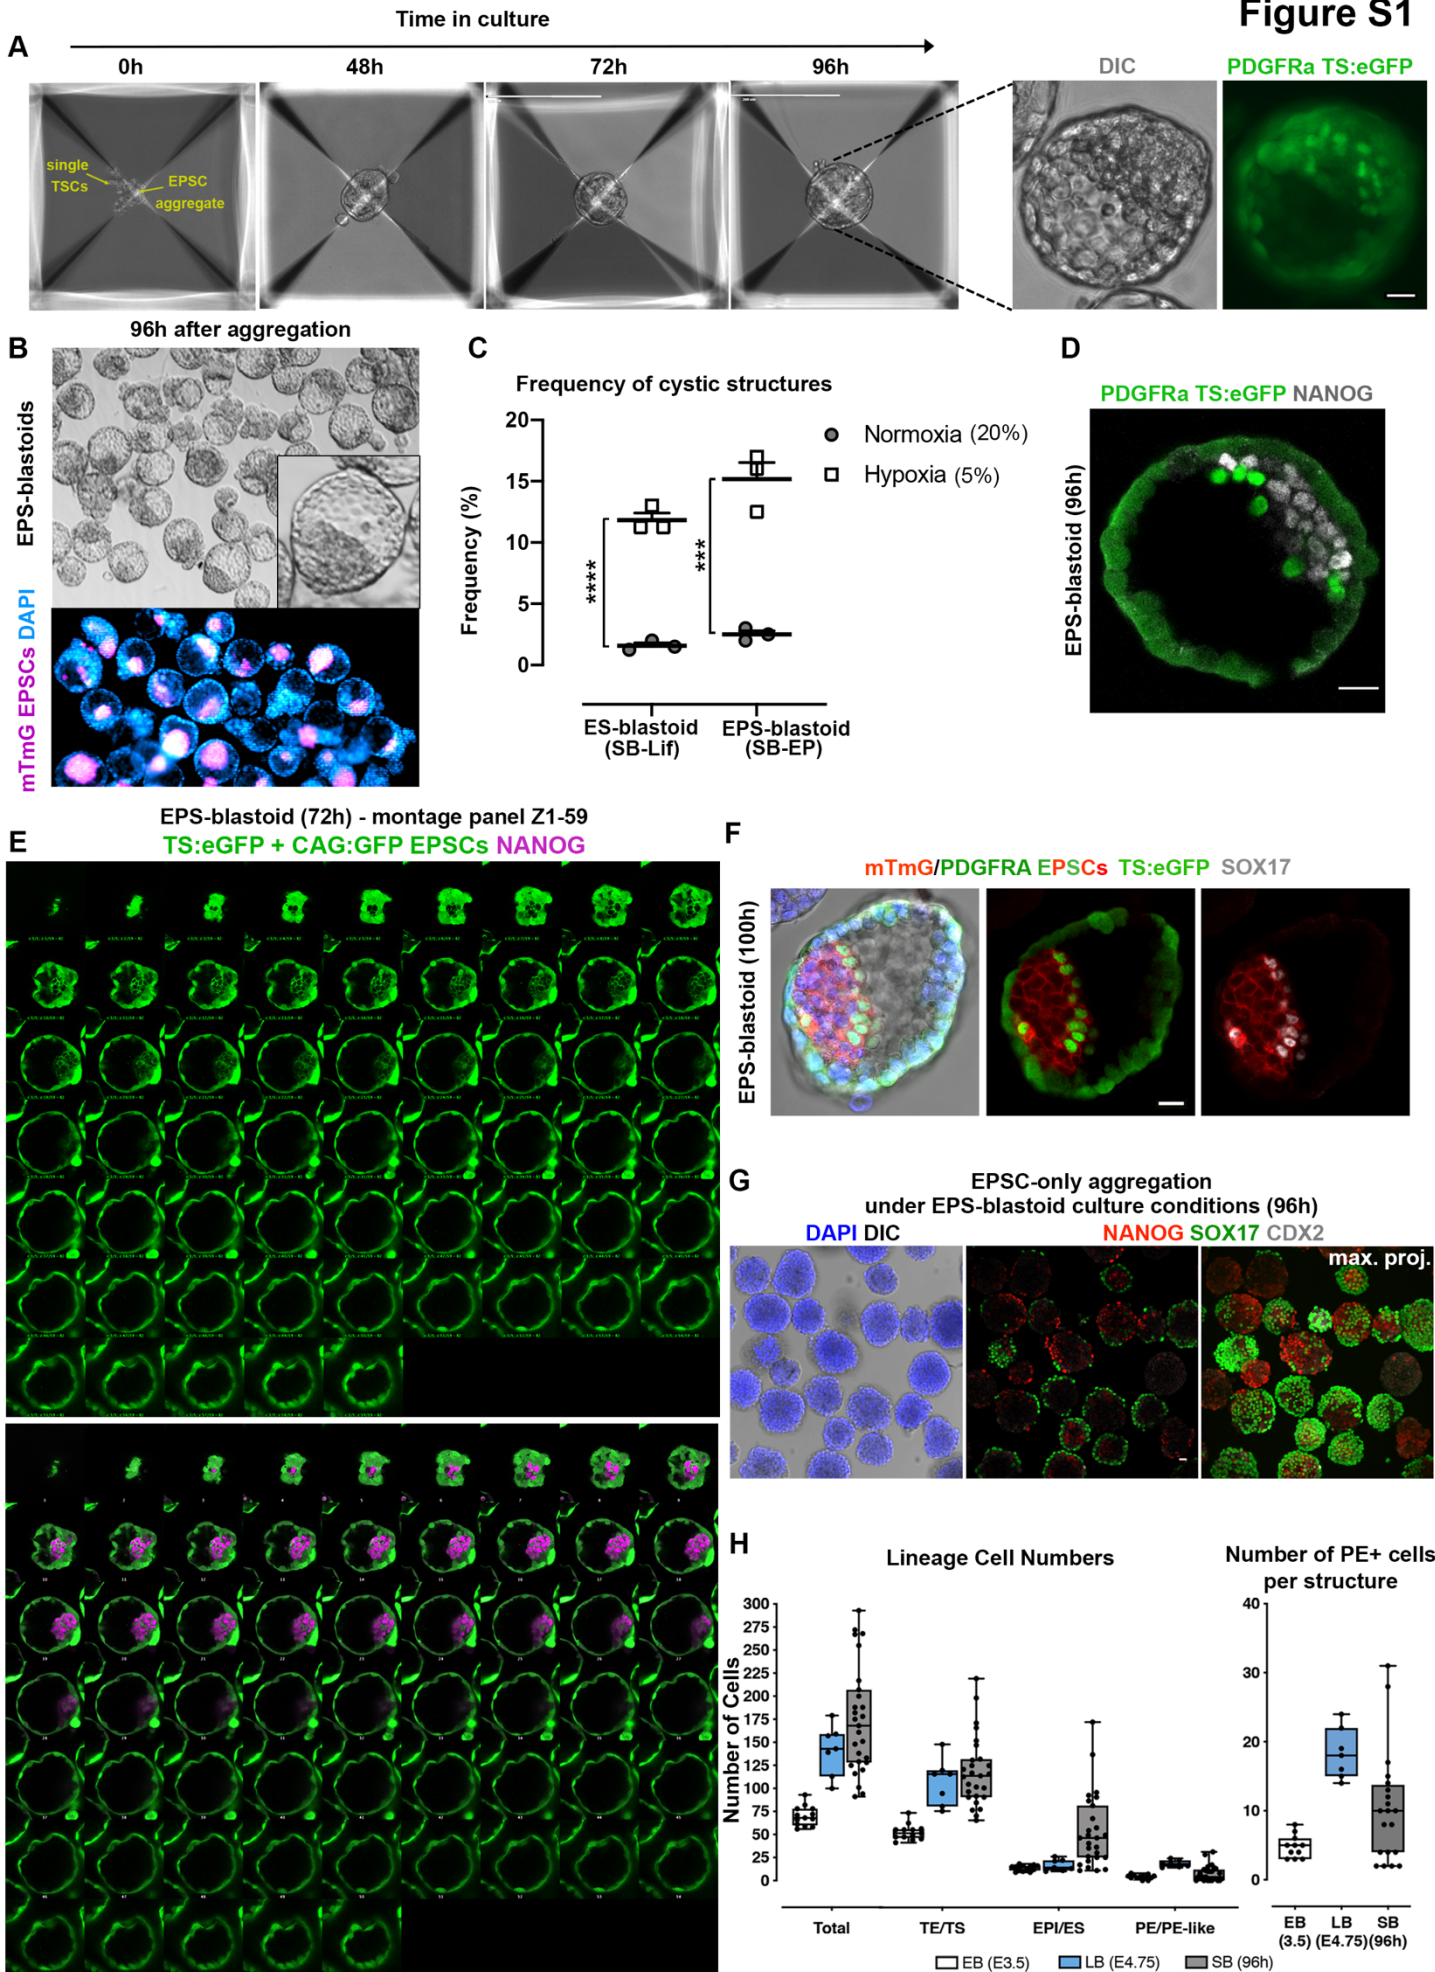

A

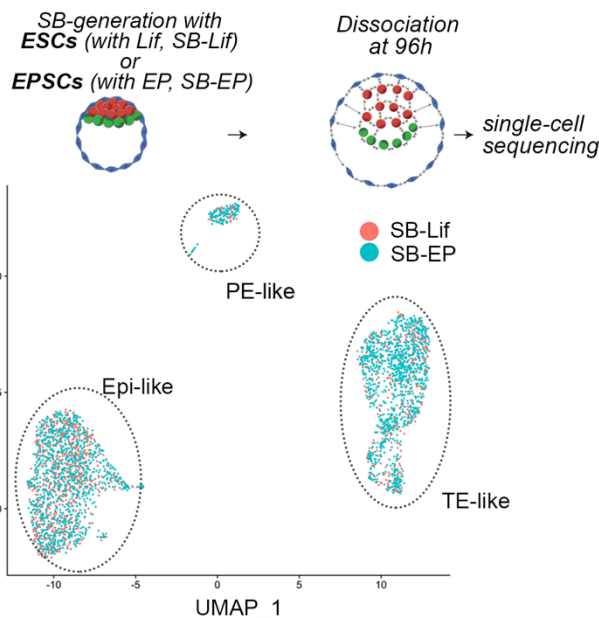

B

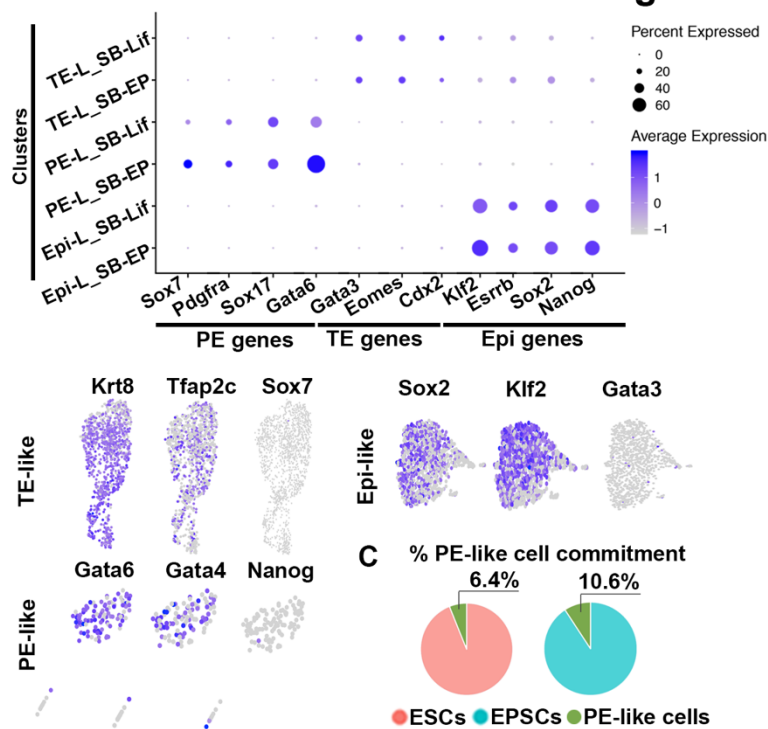

C % PE-like cell commitment

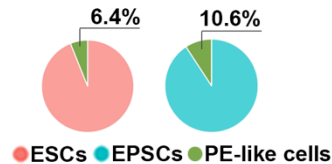

D

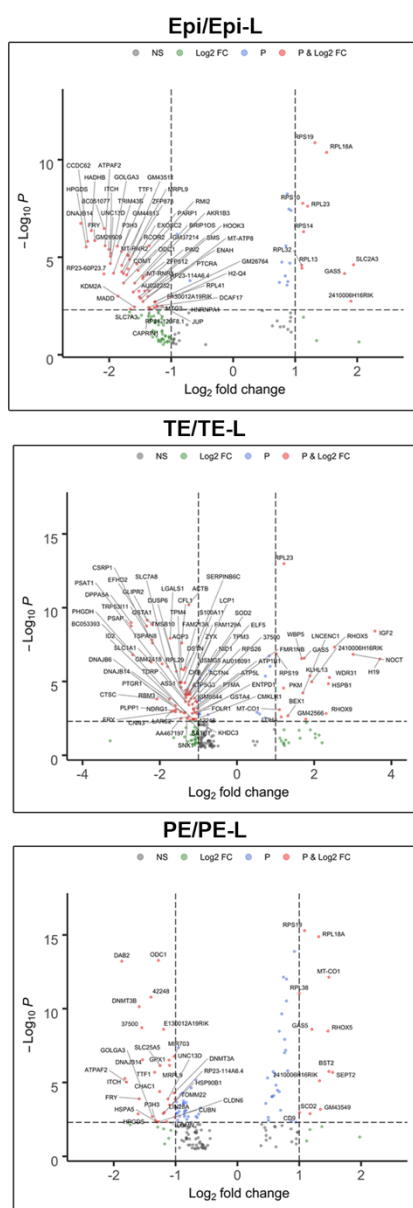

E

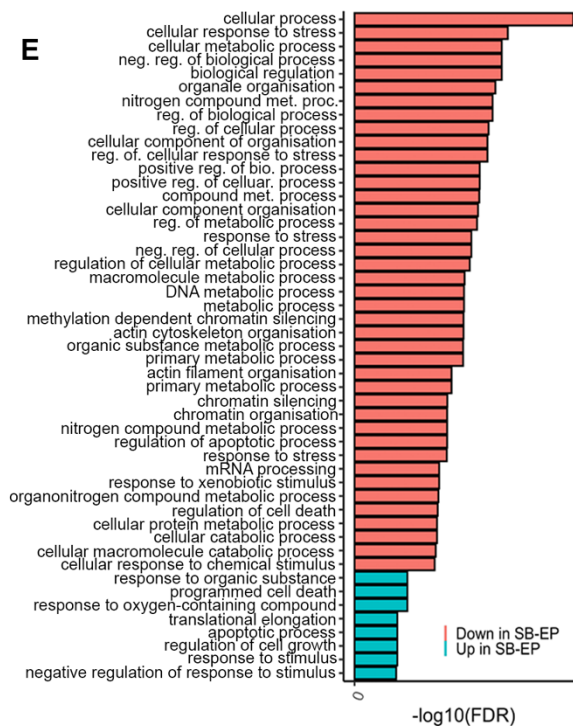

F

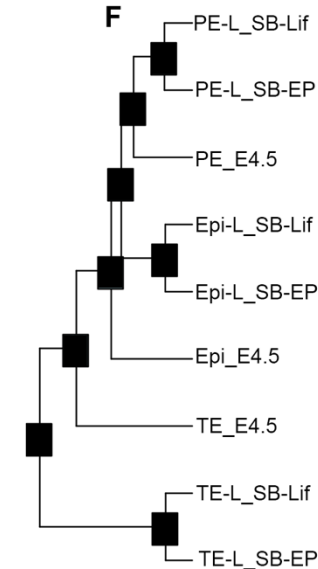

G

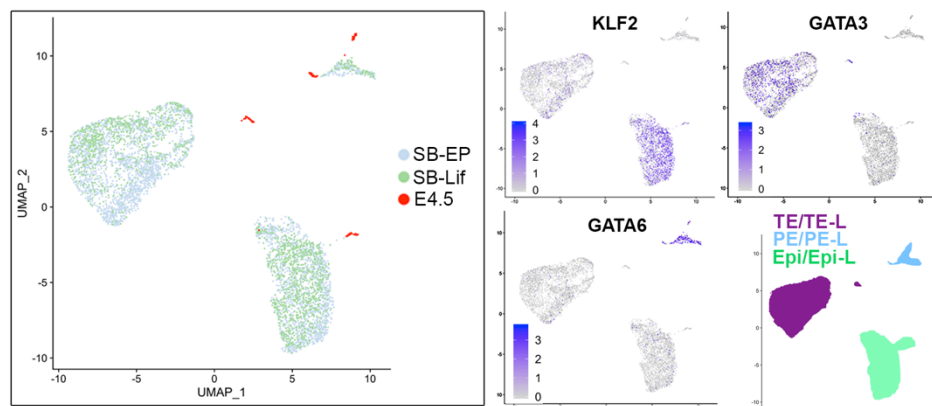

Figure S3

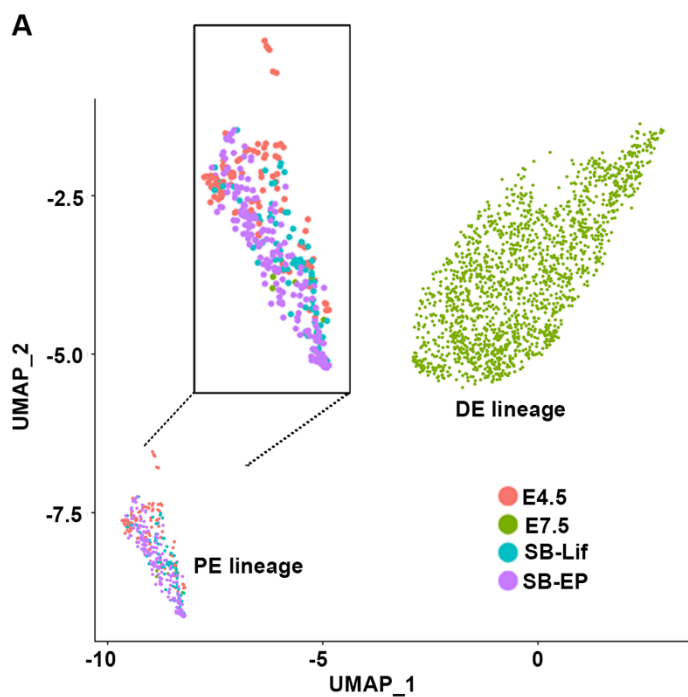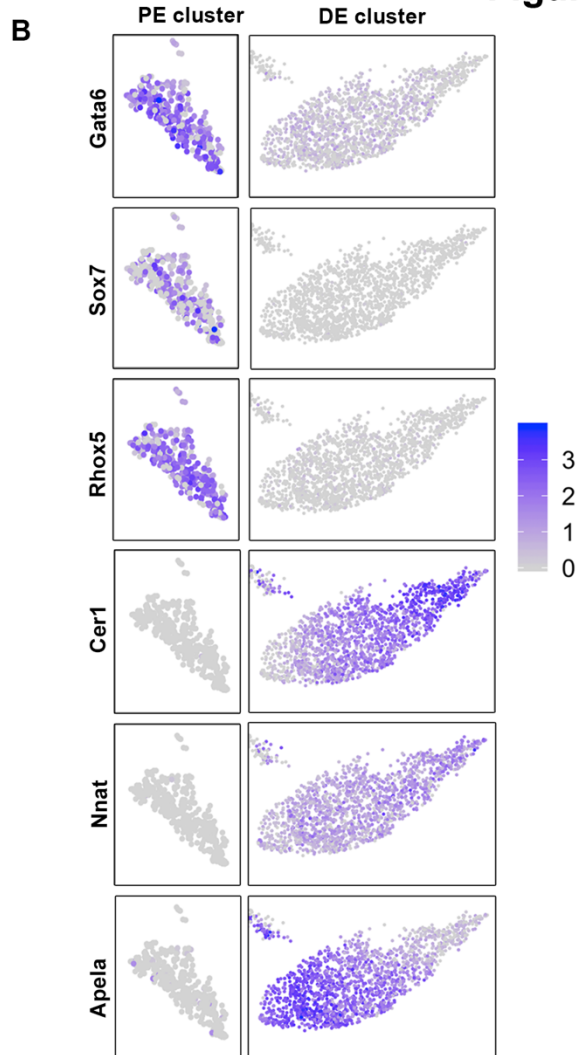

**C**

| Gene  | p_val     | avg_logFC    |
|-------|-----------|--------------|
| Sox7  | 1.18E-117 | 1.456435069  |
| Gata6 | 1.62E-48  | 1.978008538  |
| Rhox5 | 2.50E-102 | 2.359566947  |
| Nnat  | 8.73E-86  | -0.86926672  |
| Apela | 1.84E-88  | -2.10569594  |
| Cer1  | 1.04E-88  | -1.694802598 |

**Figure S4**

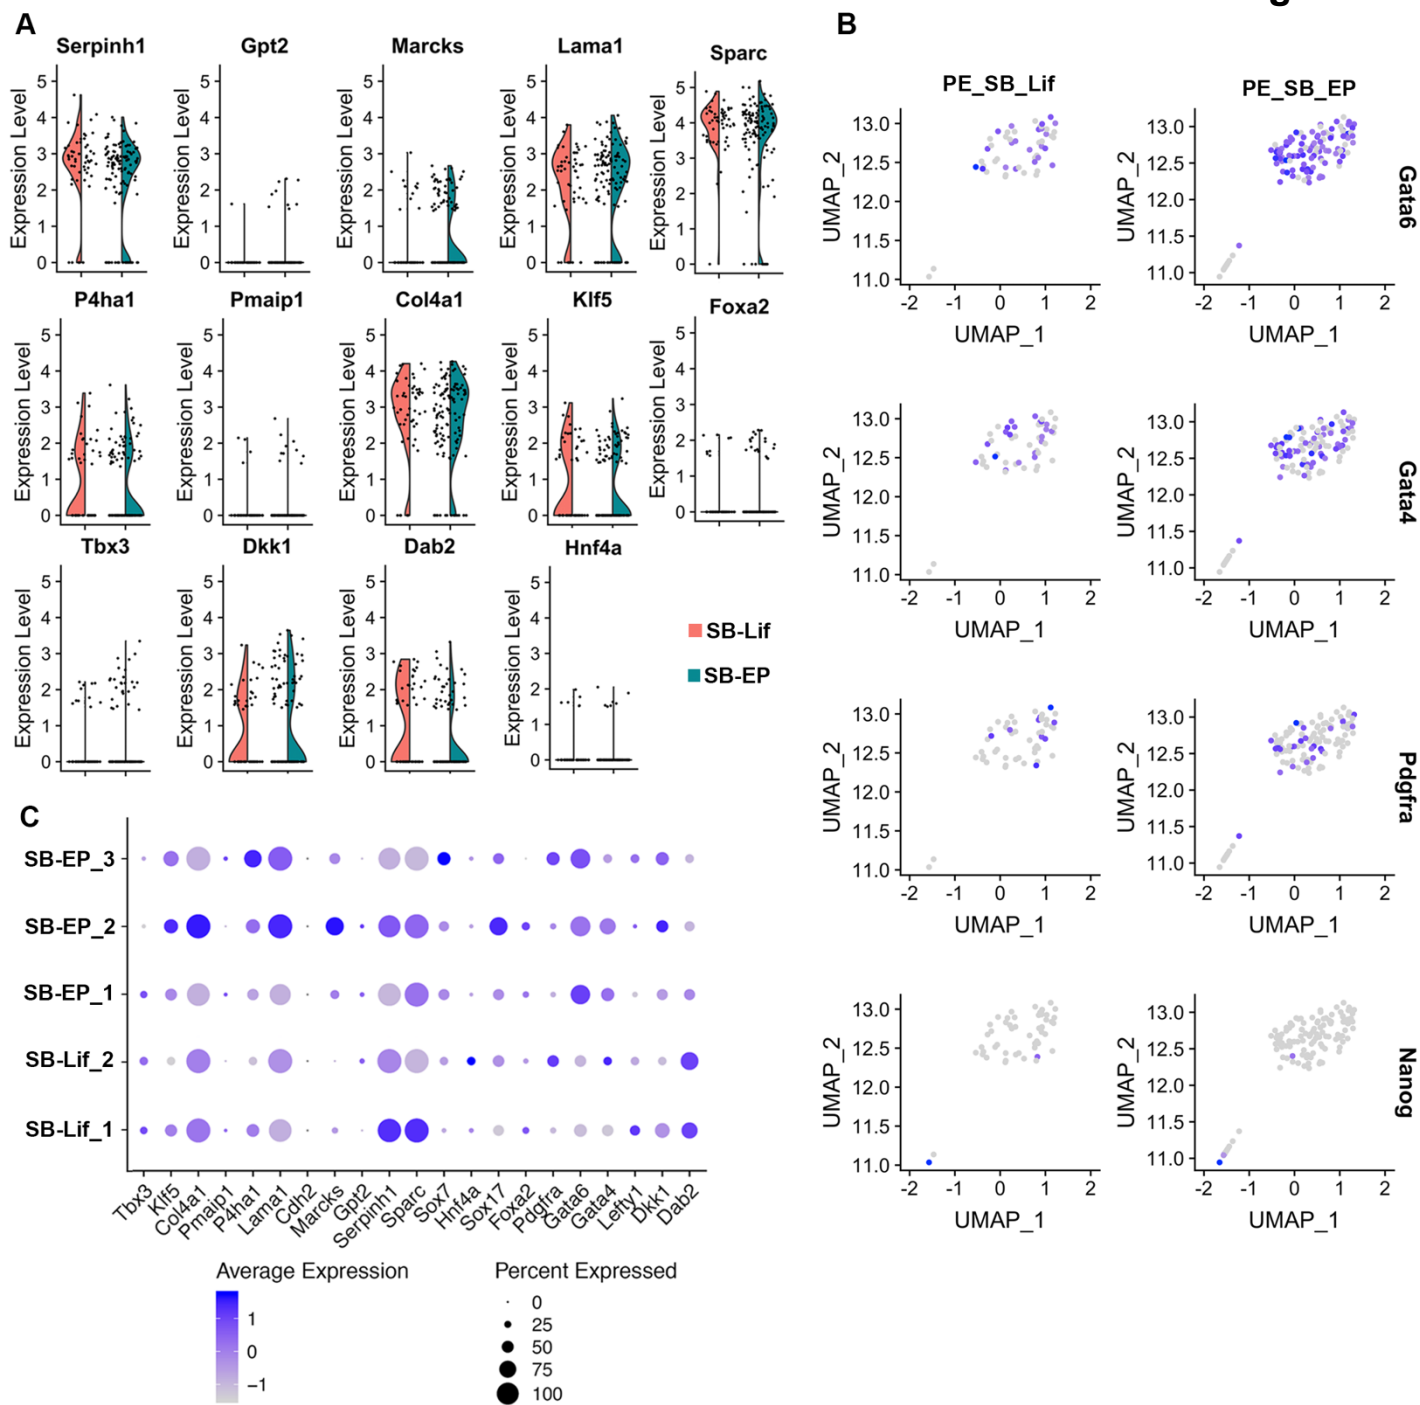



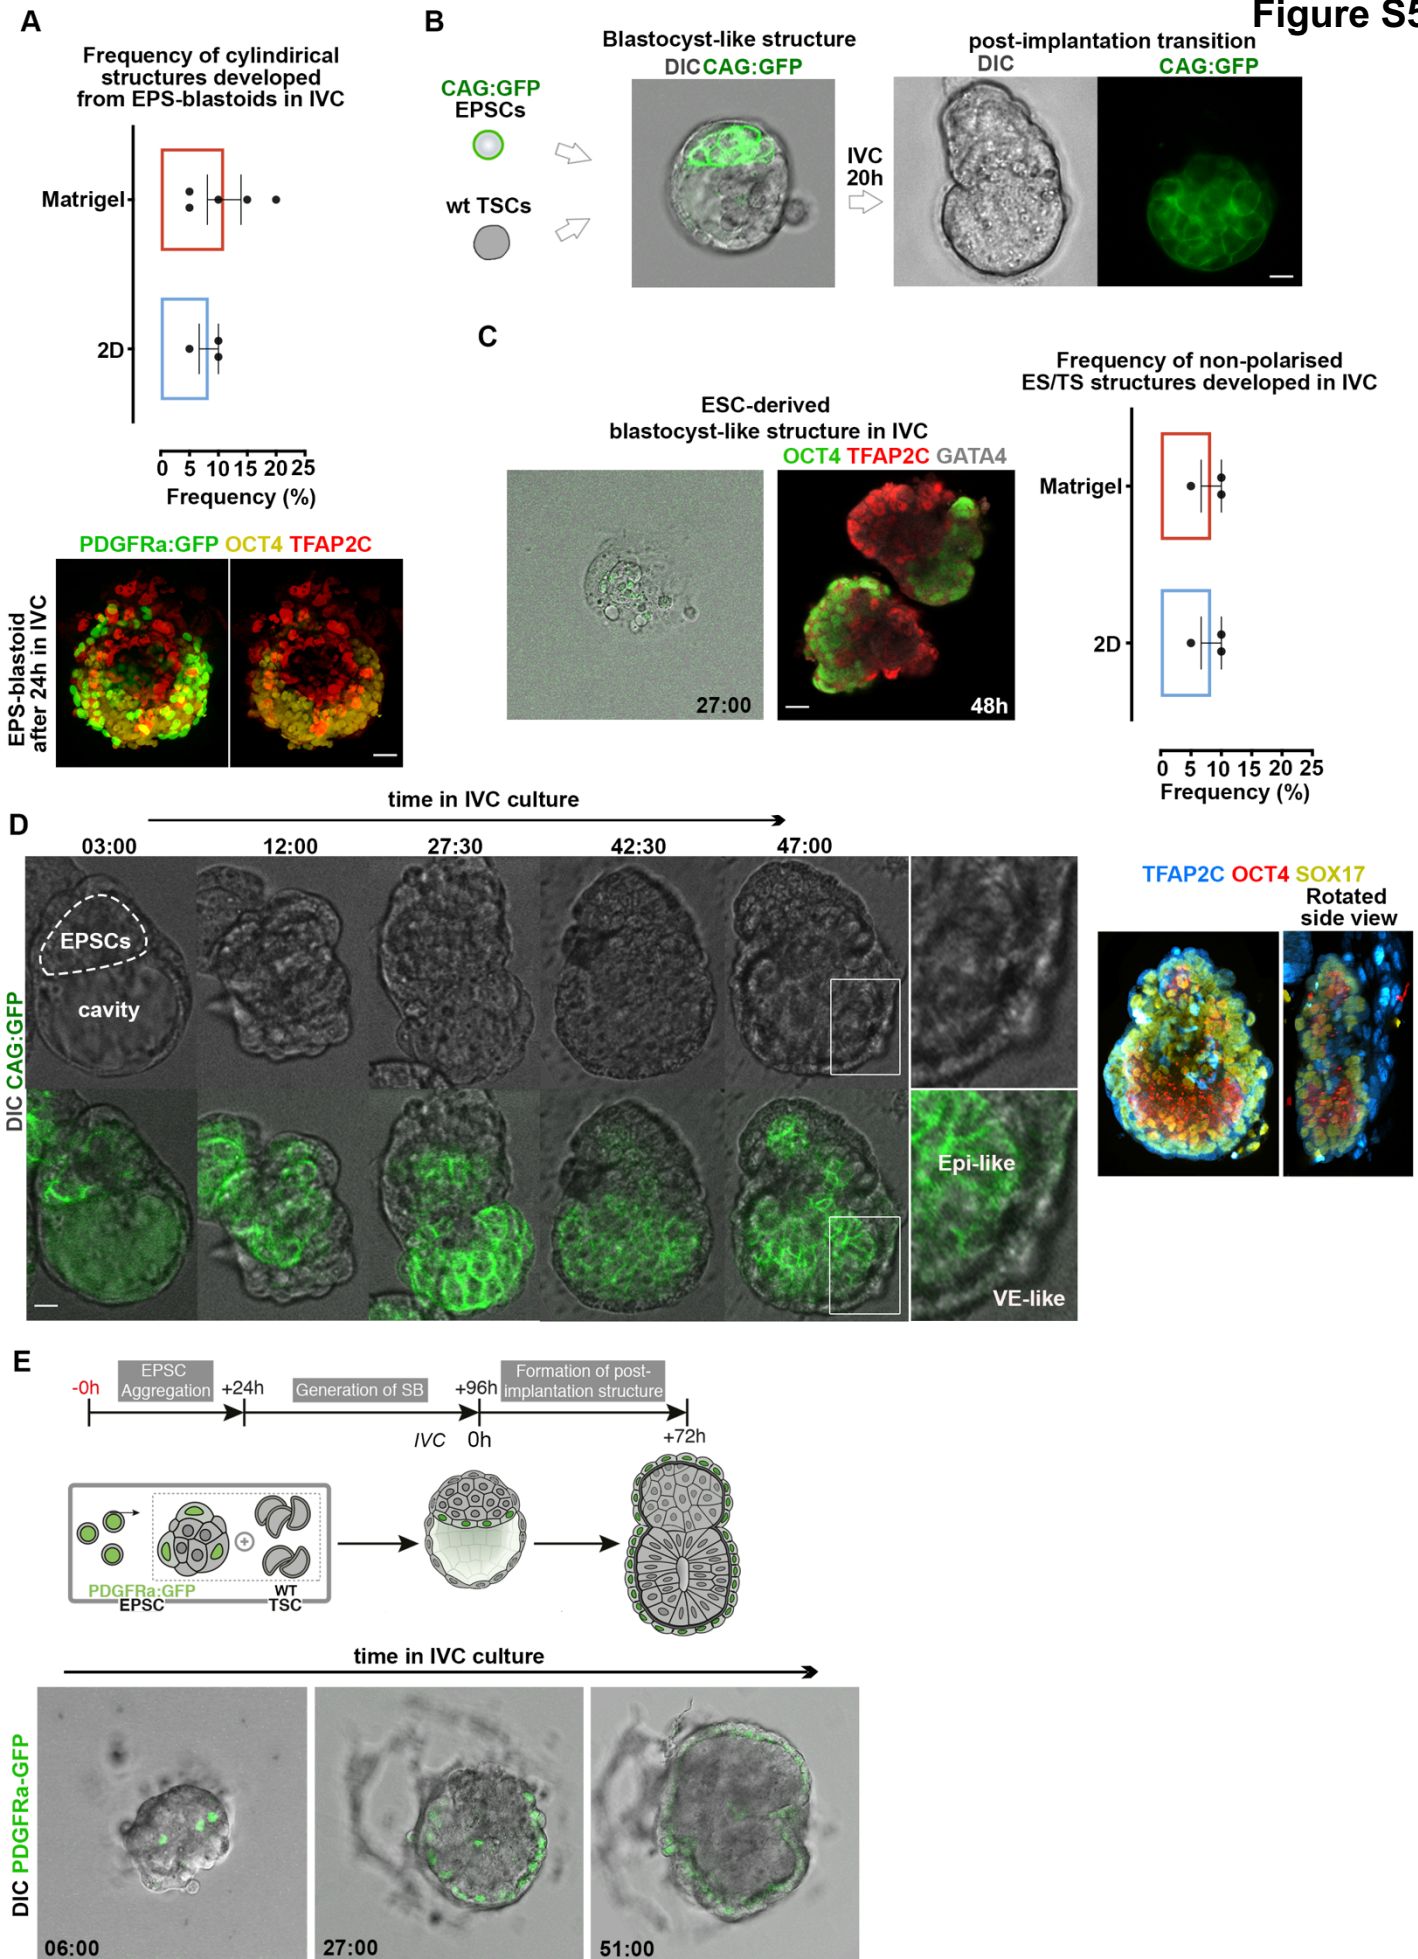

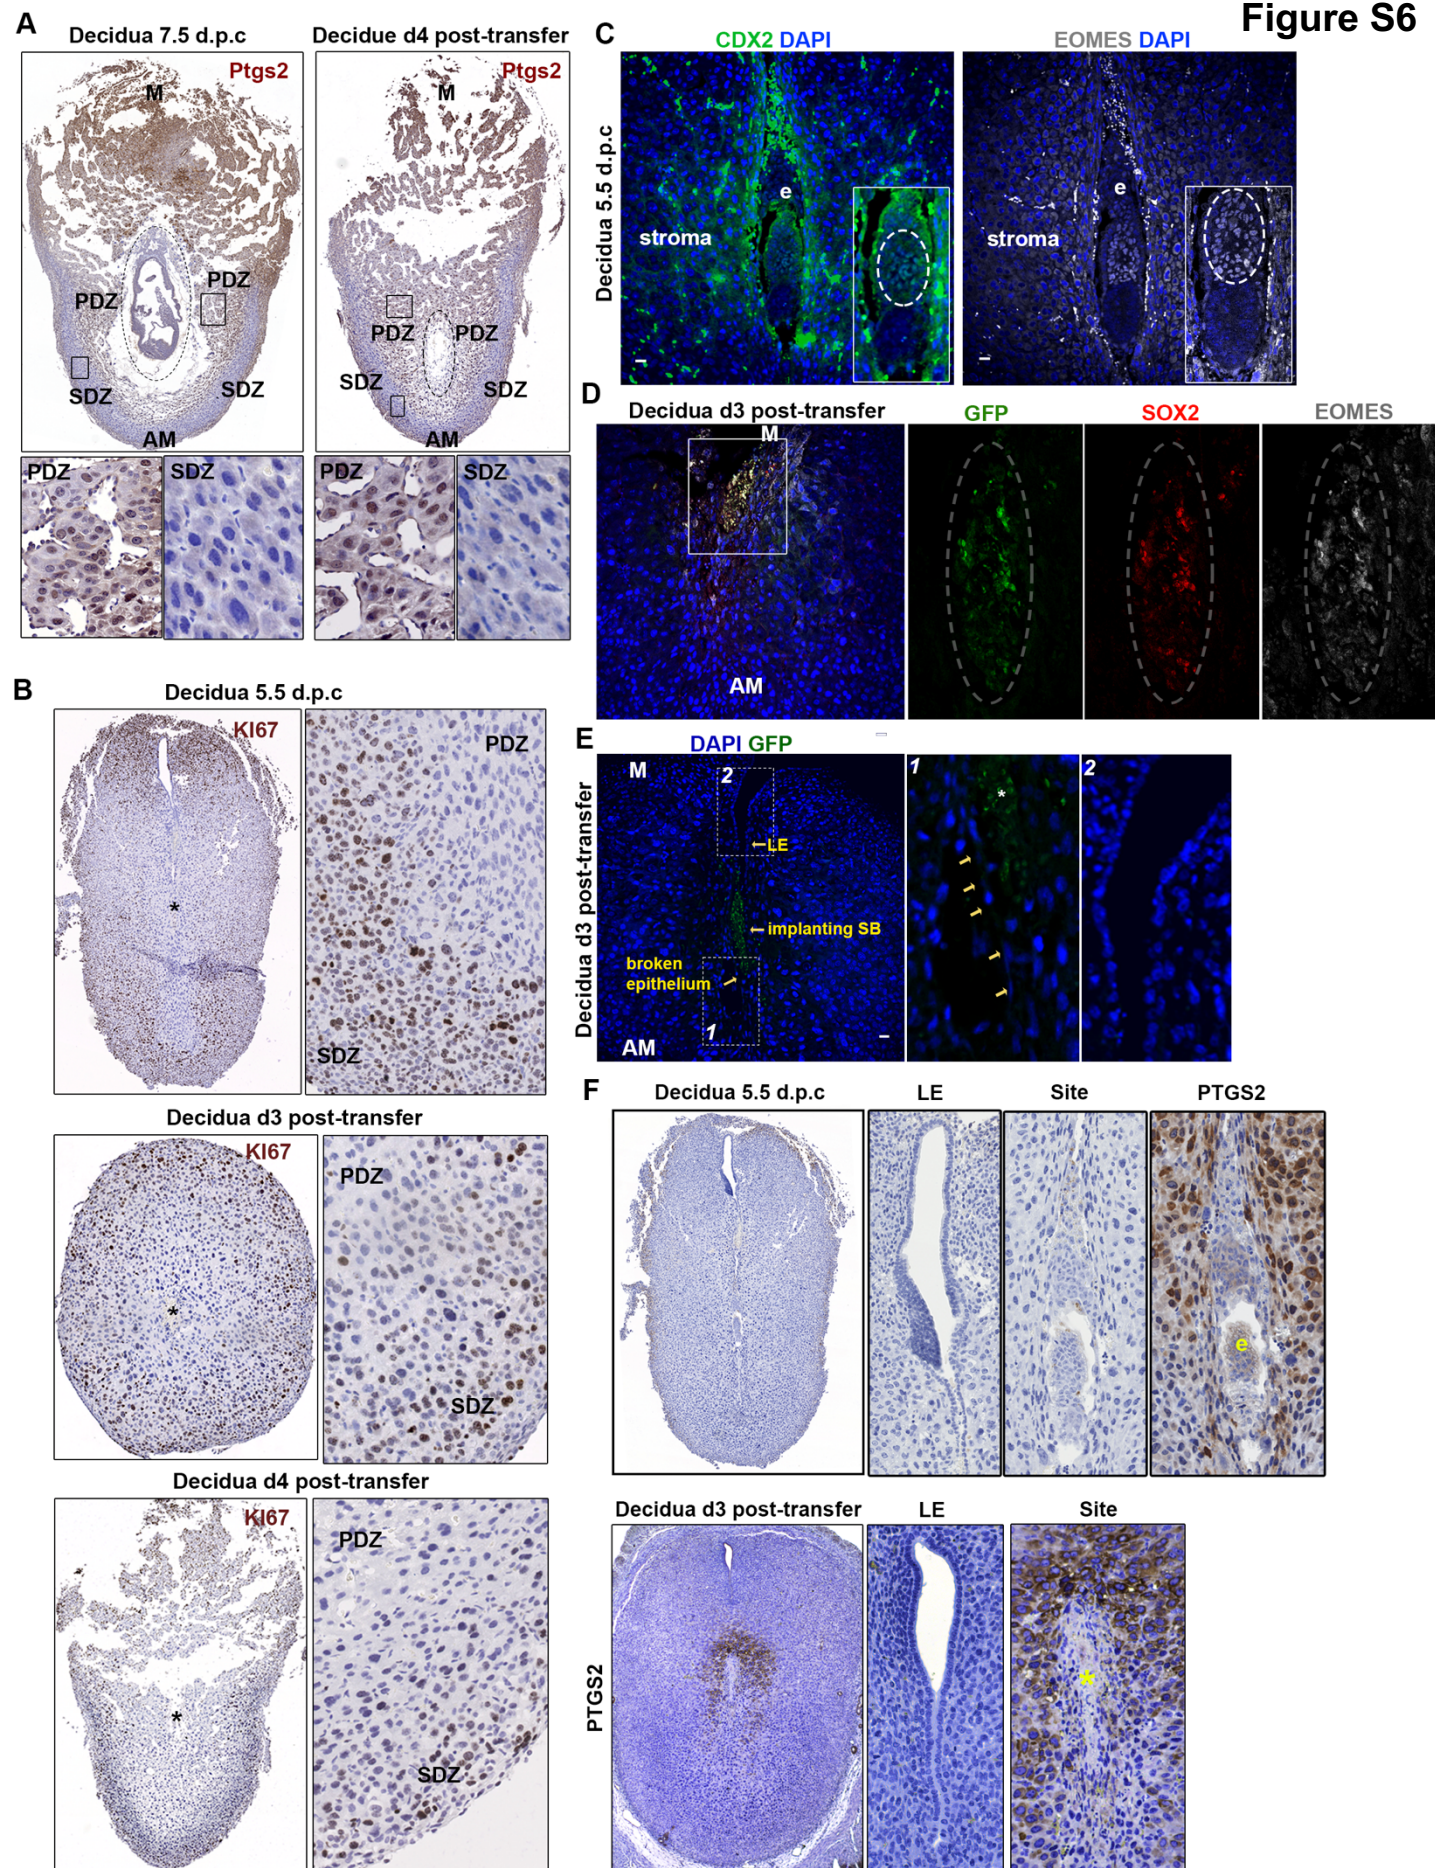

## Supplementary Table 1- oligonucleotide sequences used to barcode the final library

|                  |                                                     |
|------------------|-----------------------------------------------------|
| SB LIF 1_P5      | AATGATACGGCGACCACCGAGATCTACACCCTTCGCATCGTCGGCAGCGTC |
| SB LIF 2_P5      | AATGATACGGCGACCACCGAGATCTACACGCCGTCGATCGTCGGCAGCGTC |
| SB EP_1_P5       | AATGATACGGCGACCACCGAGATCTACACACACGATCTCGTCGGCAGCGTC |
| SB EP_2_P5       | AATGATACGGCGACCACCGAGATCTACACGATATCCATCGTCGGCAGCGTC |
| SB EP_3_P5       | AATGATACGGCGACCACCGAGATCTACACCAACATTTTCGTCGGCAGCGTC |
| E4.5 Blastocysts | AATGATACGGCGACCACCGAGATCTACACTTCGCTGATCGTCGGCAGCGTC |
| PCR_barcode_P7   | CAAGCAGAAGACGGCATAACGAGATGGGTGTCGGGTGCAG            |

## Supplementary Table 2- Sequencing and data pre-processing parameters

### 2a Sequencing parameters:

Platform: Nextseq 75bp High output  
RE-HYB No  
Read type Paired-end  
Cycles read1 61  
Cycles read2 14  
Indexing DualIndex  
Cycles index 1 8  
Cycles index 2 8

### 2b Parameters of the yaml indrop file:

```
Pl umi_quantification_arguments:  
m : 10  
u : 1  
d : 600  
split-ambigs: False  
min_non_polyA: 15  
output_unaligned_reads_to_other_fastq: False  
low_complexity_mask: False  
bowtie_arguments:  
m : 200 n:1  
l : 12  
e : 120
```

## Supplementary Table 3- Commands for UMAP dimensional reduction plotting and cluster identification

```
RunUMAP(reduction = "harmony", dims = 1:20) %>%  
FindNeighbors(reduction = "harmony", dims = 1:20) %>%  
FindClusters(resolution = 0.5) %>% identity()
```
